# Supplementary material
Source: publisher site journal article supplement (https://www.dovepress.com/article/402168)
Supplement: Supplementary file 1 [file get_supplementary_file.php]

**Supplementary Table 1.** Relative fluorescence (ET-1, ERA, and ERB) in the cytoplasm of cells from the epidermis in facial melasma and in the adjacent photoexposed nonlesional skin (n = 20 women). HE: high epidermis (spinous and granulous layers); LE: lower epidermis (suprabasal); MEL: melanocyte.

| **ET-1** | **Melasma** -Mean (SD) | **Adjacent skin** -Mean (SD) |
| --- | --- | --- |
| **HE** | 55.7 (23.2) | 42.7 (10.8) |
| **LE** | 32.8 (13.6) | 25.4 (7.2) |
| **MEL** | 29.8 (12.6) | 23.5 (6.6) |
|  |  |  |
| **ERA** |  |  |
| **HE** | 21.2 (10.3) | 30.2 (25.5) |
| **LE** | 16.8 (8.3) | 24.6 (21.9) |
| **MEL** | 12.2 (5.2) | 18.6 (18.0) |
|  |  |  |
| **ERB** |  |  |
| **HE** | 31.9 (20.2) | 32.2 (19.0) |
| **LE** | 24.6 (15.2) | 25.1 (14.5) |
| **MEL** | 20.8 (12.4) | 20.0 (11.9) |
